# Supplementary material for: Nitrogenous Fertilizer Reduces Resistance but Enhances Tolerance to the Brown Planthopper in Fast-Growing, Moderately Resistant Rice
Source: MDPI journal article supplement (doi:10.3390/insects12110989), 2021-11-03
Supplement: s1 [file s1]

Supplementary Information

Table S1: Planthopper condition after 15 days of exposure to rice varieties in the Survival bioassay under three levels of soil nitrogen. Means  $\pm$  SEM are presented. Further details are presented in Table 1.

| Variety <sup>1</sup> | Resistance sources <sup>2</sup> | Reaction <sup>3</sup> | Nitrogen <sup>4</sup> | Development (Proportion at each stage) <sup>5</sup> |                        |                        |                                 | Brachypterous <sup>5</sup> |                              | Nymph survival (proportion) <sup>5</sup> |
|----------------------|---------------------------------|-----------------------|-----------------------|-----------------------------------------------------|------------------------|------------------------|---------------------------------|----------------------------|------------------------------|------------------------------------------|
|                      |                                 |                       |                       | 3 <sup>rd</sup> instar                              | 4 <sup>th</sup> instar | 5 <sup>th</sup> instar | Adult                           | Female                     | Male                         |                                          |
| ADR52                | <i>BPH25, BPH26</i> + unknown   | R + T                 | 1.00                  | 0.00 $\pm$ 0.00                                     | 0.24 $\pm$ 0.04        | 0.07 $\pm$ 0.07        | 0.69 $\pm$ 0.06 <sup>ab</sup>   | 1.00 $\pm$ 0.00            | 0.39 $\pm$ 0.20 <sup>a</sup> | 0.54 $\pm$ 0.08                          |
|                      |                                 |                       | 2.00                  | 0.00 $\pm$ 0.00                                     | 0.08 $\pm$ 0.08        | 0.11 $\pm$ 0.11        | 0.81 $\pm$ 0.10                 | 1.00 $\pm$ 0.00            | 0.33 $\pm$ 0.33              | 0.42 $\pm$ 0.04                          |
|                      |                                 |                       | 3.00                  | 0.00 $\pm$ 0.00                                     | 0.11 $\pm$ 0.11        | 0.42 $\pm$ 0.13        | 0.47 $\pm$ 0.14                 | 1.00 $\pm$ 0.00            | 0.25 $\pm$ 0.14              | 0.42 $\pm$ 0.04                          |
| ASD7                 | <i>bph2</i>                     | S                     | 1.00                  | 0.00 $\pm$ 0.00                                     | 0.00 $\pm$ 0.00        | 0.07 $\pm$ 0.07        | 0.93 $\pm$ 0.07 <sup>bcd</sup>  | 1.00 $\pm$ 0.00            | 0.33 $\pm$ 0.00 <sup>a</sup> | 0.50 $\pm$ 0.07                          |
|                      |                                 |                       | 2.00                  | 0.07 $\pm$ 0.07                                     | 0.07 $\pm$ 0.07        | 0.04 $\pm$ 0.04        | 0.81 $\pm$ 0.19                 | 1.00 $\pm$ 0.00            | 0.00 $\pm$ 0.00              | 0.59 $\pm$ 0.16                          |
|                      |                                 |                       | 3.00                  | 0.00 $\pm$ 0.00                                     | 0.00 $\pm$ 0.00        | 0.21 $\pm$ 0.21        | 0.79 $\pm$ 0.21                 | 1.00 $\pm$ 0.00            | 0.00 $\pm$ 0.00              | 0.75 $\pm$ 0.13                          |
| IR22                 | None                            | S                     | 1.00                  | 0.00 $\pm$ 0.00                                     | 0.00 $\pm$ 0.00        | 0.00 $\pm$ 0.00        | 1.00 $\pm$ 0.00 <sup>bcd</sup>  | 1.00 $\pm$ 0.00            | 0.22 $\pm$ 0.11 <sup>a</sup> | 0.46 $\pm$ 0.04                          |
|                      |                                 |                       | 2.00                  | 0.00 $\pm$ 0.00                                     | 0.00 $\pm$ 0.00        | 0.00 $\pm$ 0.00        | 1.00 $\pm$ 0.00                 | 1.00 $\pm$ 0.00            | 0.50 $\pm$ 0.29              | 0.54 $\pm$ 0.08                          |
|                      |                                 |                       | 3.00                  | 0.00 $\pm$ 0.00                                     | 0.00 $\pm$ 0.00        | 0.24 $\pm$ 0.24        | 0.76 $\pm$ 0.12                 | 0.92 $\pm$ 0.08            | 0.00 $\pm$ 0.00              | 0.50 $\pm$ 0.07                          |
| IR40                 | <i>Bph1</i>                     | S                     | 1.00                  | 0.00 $\pm$ 0.00                                     | 0.00 $\pm$ 0.00        | 0.00 $\pm$ 0.00        | 1.00 $\pm$ 0.00 <sup>d</sup>    | 1.00 $\pm$ 0.00            | 0.00 $\pm$ 0.00 <sup>a</sup> | 0.50 $\pm$ 0.07                          |
|                      |                                 |                       | 2.00                  | 0.00 $\pm$ 0.00                                     | 0.00 $\pm$ 0.00        | 0.00 $\pm$ 0.00        | 1.00 $\pm$ 0.00                 | 1.00 $\pm$ 0.00            | 0.25 $\pm$ 0.15              | 0.50 $\pm$ 0.00                          |
|                      |                                 |                       | 3.00                  | 0.00 $\pm$ 0.00                                     | 0.00 $\pm$ 0.00        | 0.00 $\pm$ 0.00        | 1.00 $\pm$ 0.00                 | 1.00 $\pm$ 0.00            | 0.00 $\pm$ 0.00              | 0.46 $\pm$ 0.11                          |
| IR46                 | <i>Bph1</i>                     | MR + T                | 1.00                  | 0.00 $\pm$ 0.00                                     | 0.00 $\pm$ 0.00        | 0.22 $\pm$ 0.22        | 0.78 $\pm$ 0.22 <sup>bcd</sup>  | 1.00 $\pm$ 0.00            | 0.50 $\pm$ 0.29 <sup>a</sup> | 0.46 $\pm$ 0.04                          |
|                      |                                 |                       | 2.00                  | 0.00 $\pm$ 0.00                                     | 0.00 $\pm$ 0.00        | 0.00 $\pm$ 0.00        | 1.00 $\pm$ 0.00                 | 0.83 $\pm$ 0.17            | 0.28 $\pm$ 0.15              | 0.58 $\pm$ 0.04                          |
|                      |                                 |                       | 3.00                  | 0.00 $\pm$ 0.00                                     | 0.00 $\pm$ 0.00        | 0.15 $\pm$ 0.08        | 0.85 $\pm$ 0.08                 | 1.00 $\pm$ 0.00            | 0.33 $\pm$ 0.33              | 0.50 $\pm$ 0.07                          |
| IR60                 | <i>Bph3/BPH32</i>               | MR                    | 1.00                  | 0.23 $\pm$ 0.15                                     | 0.43 $\pm$ 0.23        | 0.00 $\pm$ 0.00        | 0.33 $\pm$ 0.33 <sup>abc</sup>  | 1.00 $\pm$ 0.00            | 0.50 $\pm$ 0.29 <sup>a</sup> | 0.42 $\pm$ 0.15                          |
|                      |                                 |                       | 2.00                  | 0.17 $\pm$ 0.17                                     | 0.00 $\pm$ 0.00        | 0.22 $\pm$ 0.12        | 0.62 $\pm$ 0.22                 | 0.92 $\pm$ 0.08            | 0.50 $\pm$ 0.29              | 0.71 $\pm$ 0.15                          |
|                      |                                 |                       | 3.00                  | 0.00 $\pm$ 0.00                                     | 0.00 $\pm$ 0.00        | 0.12 $\pm$ 0.06        | 0.88 $\pm$ 0.06                 | 1.00 $\pm$ 0.00            | 0.00 $\pm$ 0.00              | 0.54 $\pm$ 0.15                          |
| IR62                 | <i>Bph3/BPH32</i>               | R + T                 | 1.00                  | 0.00 $\pm$ 0.00                                     | 0.42 $\pm$ 0.30        | 0.33 $\pm$ 0.33        | 0.25 $\pm$ 0.14 <sup>a</sup>    | 1.00 $\pm$ 0.00            | 1.00 $\pm$ 0.00 <sup>b</sup> | 0.38 $\pm$ 0.13                          |
|                      |                                 |                       | 2.00                  | 0.00 $\pm$ 0.00                                     | 0.39 $\pm$ 0.31        | 0.19 $\pm$ 0.19        | 0.42 $\pm$ 0.22                 | 1.00 $\pm$ 0.00            | 0.44 $\pm$ 0.29              | 0.46 $\pm$ 0.18                          |
|                      |                                 |                       | 3.00                  | 0.00 $\pm$ 0.00                                     | 0.43 $\pm$ 0.12        | 0.22 $\pm$ 0.22        | 0.35 $\pm$ 0.05                 | 1.00 $\pm$ 0.00            | 1.00 $\pm$ 0.00              | 0.58 $\pm$ 0.04                          |
| IR65482-4            | <i>Bph10</i>                    | MR + T                | 1.00                  | 0.00 $\pm$ 0.00                                     | 0.50 $\pm$ 0.29        | 0.08 $\pm$ 0.08        | 0.42 $\pm$ 0.30 <sup>abcd</sup> | 1.00 $\pm$ 0.00            | 0.00 $\pm$ 0.00 <sup>a</sup> | 0.50 $\pm$ 0.00                          |
|                      |                                 |                       | 2.00                  | 0.00 $\pm$ 0.00                                     | 0.00 $\pm$ 0.00        | 0.23 $\pm$ 0.15        | 0.77 $\pm$ 0.15                 | 1.00 $\pm$ 0.00            | 0.33 $\pm$ 0.33              | 0.42 $\pm$ 0.11                          |
|                      |                                 |                       | 3.00                  | 0.00 $\pm$ 0.00                                     | 0.00 $\pm$ 0.00        | 0.08 $\pm$ 0.08        | 0.92 $\pm$ 0.08                 | 1.00 $\pm$ 0.00            | 0.50 $\pm$ 0.29              | 0.50 $\pm$ 0.00                          |
| IR82391 H            | <i>Bph1</i>                     | S                     | 1.00                  | 0.00 $\pm$ 0.00                                     | 0.08 $\pm$ 0.08        | 0.08 $\pm$ 0.08        | 0.83 $\pm$ 0.08 <sup>bcd</sup>  | 1.00 $\pm$ 0.00            | 0.17 $\pm$ 0.17 <sup>a</sup> | 0.54 $\pm$ 0.04                          |
|                      |                                 |                       | 2.00                  | 0.00 $\pm$ 0.00                                     | 0.00 $\pm$ 0.00        | 0.00 $\pm$ 0.00        | 1.00 $\pm$ 0.00                 | 0.89 $\pm$ 0.11            | 0.00 $\pm$ 0.00              | 0.44 $\pm$ 0.04                          |
|                      |                                 |                       | 3.00                  | 0.00 $\pm$ 0.00                                     | 0.00 $\pm$ 0.00        | 0.00 $\pm$ 0.00        | 1.00 $\pm$ 0.00                 | 1.00 $\pm$ 0.00            | 0.42 $\pm$ 0.30              | 0.46 $\pm$ 0.04                          |

|               |             |          |      |           |           |           |                           |           |                         |           |
|---------------|-------------|----------|------|-----------|-----------|-----------|---------------------------|-----------|-------------------------|-----------|
| IR82396 H     | None        | S-MR + T | 1.00 | 0.00±0.00 | 0.00±0.00 | 0.06±0.06 | 0.94±0.06 <sup>d</sup>    | 1.00±0.00 | 0.50±0.00 <sup>a</sup>  | 0.62±0.07 |
|               |             |          | 2.00 | 0.00±0.00 | 0.00±0.00 | 0.00±0.00 | 1.00±0.00                 | 1.00±0.00 | 0.25±0.14               | 0.58±0.04 |
|               |             |          | 3.00 | 0.00±0.00 | 0.00±0.00 | 0.00±0.00 | 1.00±0.00                 | 1.00±0.00 | 0.11±0.11               | 0.58±0.04 |
| Pokkali       | <i>Bph9</i> | R        | 1.00 | 0.00±0.00 | 0.00±0.00 | 0.00±0.00 | 1.00±0.00 <sup>d</sup>    | 1.00±0.00 | 0.33±0.33 <sup>a</sup>  | 0.38±0.00 |
|               |             |          | 2.00 | 0.00±0.00 | 0.00±0.00 | 0.00±0.00 | 1.00±0.00                 | 1.00±0.00 | 0.11±0.11               | 0.42±0.08 |
|               |             |          | 3.00 | 0.00±0.00 | 0.00±0.00 | 0.00±0.00 | 1.00±0.00                 | 1.00±0.00 | 0.28±0.15               | 0.42±0.15 |
| Swarnalata    | <i>Bph6</i> | MR       | 1.00 | 0.00±0.00 | 0.00±0.00 | 0.19±0.19 | 0.81±0.10 <sup>bcd</sup>  | 1.00±0.00 | 0.00±0.00 <sup>a</sup>  | 0.46±0.04 |
|               |             |          | 2.00 | 0.00±0.00 | 0.00±0.00 | 0.17±0.17 | 0.83±0.17                 | 1.00±0.00 | 0.00±0.00               | 0.58±0.04 |
|               |             |          | 3.00 | 0.00±0.06 | 0.00±0.00 | 0.00±0.00 | 0.94±0.06                 | 1.00±0.00 | 0.41±0.05               | 0.62±0.07 |
| TKM6          | <i>Bph1</i> | S        | 1.00 | 0.00±0.00 | 0.00±0.00 | 0.13±0.13 | 0.87±0.13 <sup>bcd</sup>  | 1.00±0.00 | 0.32±0.19 <sup>a</sup>  | 0.46±0.11 |
|               |             |          | 2.00 | 0.00±0.00 | 0.00±0.00 | 0.00±0.00 | 1.00±0.00                 | 1.00±0.00 | 0.11±0.11               | 0.42±0.08 |
|               |             |          | 3.00 | 0.00±0.00 | 0.00±0.00 | 0.08±0.08 | 0.92±0.08                 | 1.00±0.00 | 0.00±0.00               | 0.42±0.08 |
| TN1           | None        | S        | 1.00 | 0.00±0.00 | 0.00±0.00 | 0.07±0.07 | 0.93±0.07 <sup>bcd</sup>  | 1.00±0.00 | 0.28±0.15 <sup>ab</sup> | 0.58±0.04 |
|               |             |          | 2.00 | 0.00±0.00 | 0.00±0.00 | 0.28±0.28 | 0.72±0.19                 | 1.00±0.00 | 0.75±0.14               | 0.76±0.08 |
|               |             |          | 3.00 | 0.00±0.00 | 0.00±0.00 | 0.00±0.00 | 1.00±0.00                 | 1.00±0.00 | 0.36±0.22               | 0.46±0.11 |
| Triveni       | unknown     | MR + T   | 1.00 | 0.00±0.00 | 0.11±0.11 | 0.41±0.05 | 0.48±0.08 <sup>abcd</sup> | 0.61±0.20 | 0.00±0.00 <sup>a</sup>  | 0.50±0.07 |
|               |             |          | 2.00 | 0.06±0.06 | 0.08±0.08 | 0.14±0.14 | 0.72±0.15                 | 1.00±0.00 | 0.17±0.17               | 0.54±0.11 |
|               |             |          | 3.00 | 0.00±0.00 | 0.00±0.00 | 0.06±0.06 | 0.94±0.06                 | 1.00±0.00 | 0.58±0.30               | 0.46±0.15 |
| Utri Rajapan  | unknown     | MR + T   | 1.00 | 0.00±0.00 | 0.00±0.00 | 0.00±0.00 | 1.00±0.00 <sup>bcd</sup>  | 1.00±0.00 | 0.00±0.00 <sup>a</sup>  | 0.58±0.04 |
|               |             |          | 2.00 | 0.00±0.00 | 0.00±0.00 | 0.00±0.00 | 1.00±0.00                 | 1.00±0.00 | 0.00±0.00               | 0.42±0.15 |
|               |             |          | 3.00 | 0.00±0.00 | 0.13±0.13 | 0.00±0.00 | 0.87±0.13                 | 1.00±0.00 | 0.33±0.33               | 0.54±0.04 |
| F-variety     |             |          |      |           |           |           | 6.636***                  | 1.541ns   | 3.496***                | 1.498ns   |
| F-nitrogen    |             |          |      |           |           |           | 2.448ns                   | 0.723ns   | 0.218ns                 | 0.843ns   |
| F-interaction |             |          |      |           |           |           | 1.090ns                   | 1.991**   | 1.501ns                 | 0.970ns   |

1: Varieties are presented in alphabetical order

2: Genes are based on published records as indicated in the main text

3: Reactions are based on insect responses to plants from this study and corresponding damage to plant, also based on this study

4: 1 = 0 added nitrogen, 2 = 60 Kg N ha<sup>-1</sup>, 3 = 150 Kg N ha<sup>-1</sup>

5: Lowercase letters indicate homogenous variety groups based on Tukey's LSD test (P > 0.05); ns = no significant effect (P > 0.05), \*\* = P ≤ 0.01; \*\*\* = P ≤ 0.001; degrees of freedom (df) = 15,94 for variety, 2,94 for nitrogen, and 30,94 for interaction.

Table S2: Growth parameters for planthopper infested and control, non-infested plants during the Survival bioassay under three levels of soil nitrogen. Means  $\pm$  SEM are presented. Further details are presented in Table 2. Data analyses are presented in the main text.

| Variety <sup>1</sup> | Nitrogen <sup>2</sup> | Damage rating (SES score) | Reaction <sup>3</sup> | 30 DAS shoot weight (g dry weight) | 30 DAS root weight (g dry weight) | 45 DAS shoot weight (g dry weight) | 45 DAS root weight (g dry weight) | 30 DAS non-infested plant weight (g dry weight) | 45 DAS non-infested plant weight (g dry weight) | Growth rate of non-infested plants (g day <sup>-1</sup> ) | 45 DAS infested plant weight (g dry weight) | Growth rate of infested plants (g day <sup>-1</sup> ) |
|----------------------|-----------------------|---------------------------|-----------------------|------------------------------------|-----------------------------------|------------------------------------|-----------------------------------|-------------------------------------------------|-------------------------------------------------|-----------------------------------------------------------|---------------------------------------------|-------------------------------------------------------|
| ADR52                | 1                     | 1.33 $\pm$ 0.88           | R                     | 0.43 $\pm$ 0.14                    | 0.18 $\pm$ 0.06                   | 1.79 $\pm$ 0.24                    | 1.15 $\pm$ 0.27                   | 0.61 $\pm$ 0.20                                 | 3.37 $\pm$ 0.47                                 | 0.16 $\pm$ 0.04                                           | 1.87 $\pm$ 0.58                             | 0.08 $\pm$ 0.05                                       |
|                      | 2                     | 1.00 $\pm$ 0.00           | R                     | 0.64 $\pm$ 0.17                    | 0.31 $\pm$ 0.06                   | 3.17 $\pm$ 0.23                    | 1.28 $\pm$ 0.10                   | 0.95 $\pm$ 0.22                                 | 5.12 $\pm$ 0.34                                 | 0.23 $\pm$ 0.01                                           | 3.81 $\pm$ 0.06                             | 0.19 $\pm$ 0.02                                       |
|                      | 3                     | 2.33 $\pm$ 1.33           | R                     | 0.88 $\pm$ 0.14                    | 0.45 $\pm$ 0.08                   | 5.42 $\pm$ 0.14                    | 1.98 $\pm$ 0.16                   | 1.33 $\pm$ 0.22                                 | 7.92 $\pm$ 0.30                                 | 0.40 $\pm$ 0.01                                           | 4.27 $\pm$ 1.49                             | 0.20 $\pm$ 0.08                                       |
| ASD7                 | 1                     | 5.67 $\pm$ 0.67           | S                     | 0.35 $\pm$ 0.14                    | 0.23 $\pm$ 0.09                   | 1.42 $\pm$ 0.46                    | 0.90 $\pm$ 0.14                   | 0.59 $\pm$ 0.22                                 | 3.38 $\pm$ 0.61                                 | 0.12 $\pm$ 0.04                                           | 1.38 $\pm$ 0.50                             | 0.05 $\pm$ 0.02                                       |
|                      | 2                     | 6.33 $\pm$ 0.33           | S                     | 0.80 $\pm$ 0.28                    | 0.54 $\pm$ 0.26                   | 2.74 $\pm$ 0.82                    | 1.45 $\pm$ 0.24                   | 1.34 $\pm$ 0.51                                 | 5.44 $\pm$ 1.06                                 | 0.19 $\pm$ 0.05                                           | 2.71 $\pm$ 0.49                             | 0.09 $\pm$ 0.06                                       |
|                      | 3                     | 5.67 $\pm$ 0.67           | S                     | 0.71 $\pm$ 0.18                    | 0.42 $\pm$ 0.05                   | 3.03 $\pm$ 0.52                    | 1.64 $\pm$ 0.41                   | 1.14 $\pm$ 0.23                                 | 5.31 $\pm$ 0.92                                 | 0.24 $\pm$ 0.05                                           | 3.09 $\pm$ 0.54                             | 0.13 $\pm$ 0.02                                       |
| IR22                 | 1                     | 6.33 $\pm$ 0.33           | S                     | 0.08 $\pm$ 0.04                    | 0.05 $\pm$ 0.02                   | 0.90 $\pm$ 0.49                    | 0.62 $\pm$ 0.22                   | 0.13 $\pm$ 0.06                                 | 0.78 $\pm$ 0.71                                 | 0.09 $\pm$ 0.05                                           | 0.70 $\pm$ 0.32                             | 0.04 $\pm$ 0.02                                       |
|                      | 2                     | 6.33 $\pm$ 0.33           | S                     | 0.13 $\pm$ 0.07                    | 0.07 $\pm$ 0.02                   | 1.54 $\pm$ 0.31                    | 0.88 $\pm$ 0.20                   | 0.20 $\pm$ 0.09                                 | 1.65 $\pm$ 0.51                                 | 0.15 $\pm$ 0.03                                           | 2.26 $\pm$ 0.11                             | 0.14 $\pm$ 0.00                                       |
|                      | 3                     | 6.67 $\pm$ 0.33           | S                     | 0.22 $\pm$ 0.06                    | 0.15 $\pm$ 0.04                   | 2.93 $\pm$ 0.01                    | 1.73 $\pm$ 0.31                   | 0.37 $\pm$ 0.10                                 | 4.70 $\pm$ 0.29                                 | 0.29 $\pm$ 0.03                                           | 2.13 $\pm$ 0.36                             | 0.12 $\pm$ 0.03                                       |
| IR40                 | 1                     | 6.00 $\pm$ 1.00           | S                     | 0.21 $\pm$ 0.07                    | 0.12 $\pm$ 0.02                   | 0.59 $\pm$ 0.04                    | 0.41 $\pm$ 0.04                   | 0.34 $\pm$ 0.08                                 | 1.00 $\pm$ 0.08                                 | 0.04 $\pm$ 0.01                                           | 0.65 $\pm$ 0.04                             | 0.02 $\pm$ 0.01                                       |
|                      | 2                     | 6.33 $\pm$ 0.33           | S                     | 0.15 $\pm$ 0.03                    | 0.05 $\pm$ 0.01                   | 1.90 $\pm$ 0.43                    | 1.23 $\pm$ 0.94                   | 0.20 $\pm$ 0.03                                 | 2.24 $\pm$ 1.36                                 | 0.19 $\pm$ 0.09                                           | 1.65 $\pm$ 0.18                             | 0.10 $\pm$ 0.01                                       |
|                      | 3                     | 7.00 $\pm$ 0.00           | S                     | 0.23 $\pm$ 0.09                    | 0.18 $\pm$ 0.04                   | 1.96 $\pm$ 0.11                    | 0.87 $\pm$ 0.16                   | 0.41 $\pm$ 0.12                                 | 2.29 $\pm$ 0.27                                 | 0.16 $\pm$ 0.01                                           | 2.02 $\pm$ 0.01                             | 0.11 $\pm$ 0.01                                       |
| IR46                 | 1                     | 5.67 $\pm$ 1.33           | S                     | 0.15 $\pm$ 0.05                    | 0.17 $\pm$ 0.03                   | 1.45 $\pm$ 0.37                    | 0.87 $\pm$ 0.07                   | 0.32 $\pm$ 0.05                                 | 1.61 $\pm$ 0.40                                 | 0.13 $\pm$ 0.03                                           | 0.88 $\pm$ 0.42                             | 0.04 $\pm$ 0.03                                       |
|                      | 2                     | 4.33 $\pm$ 0.67           | S                     | 0.49 $\pm$ 0.17                    | 0.14 $\pm$ 0.02                   | 3.71 $\pm$ 0.34                    | 1.63 $\pm$ 0.16                   | 0.63 $\pm$ 0.19                                 | 5.09 $\pm$ 0.33                                 | 0.31 $\pm$ 0.03                                           | 2.32 $\pm$ 0.46                             | 0.11 $\pm$ 0.04                                       |
|                      | 3                     | 5.00 $\pm$ 1.15           | S                     | 0.53 $\pm$ 0.20                    | 0.27 $\pm$ 0.15                   | 2.70 $\pm$ 0.43                    | 1.45 $\pm$ 0.15                   | 0.80 $\pm$ 0.35                                 | 3.80 $\pm$ 0.28                                 | 0.22 $\pm$ 0.04                                           | 3.27 $\pm$ 0.86                             | 0.16 $\pm$ 0.06                                       |
| IR60                 | 1                     | 3.67 $\pm$ 1.33           | MR                    | 0.27 $\pm$ 0.12                    | 0.21 $\pm$ 0.09                   | 0.79 $\pm$ 0.31                    | 0.47 $\pm$ 0.17                   | 0.48 $\pm$ 0.21                                 | 0.63 $\pm$ 0.47                                 | 0.05 $\pm$ 0.02                                           | 0.85 $\pm$ 0.11                             | 0.02 $\pm$ 0.02                                       |
|                      | 2                     | 3.67 $\pm$ 0.67           | MR                    | 0.34 $\pm$ 0.06                    | 0.33 $\pm$ 0.09                   | 2.40 $\pm$ 0.23                    | 1.28 $\pm$ 0.28                   | 0.67 $\pm$ 0.13                                 | 3.70 $\pm$ 0.47                                 | 0.20 $\pm$ 0.04                                           | 2.25 $\pm$ 0.37                             | 0.11 $\pm$ 0.03                                       |
|                      | 3                     | 3.00 $\pm$ 0.00           | MR                    | 0.62 $\pm$ 0.03                    | 0.36 $\pm$ 0.05                   | 3.35 $\pm$ 0.71                    | 2.03 $\pm$ 0.55                   | 0.98 $\pm$ 0.06                                 | 7.82 $\pm$ 1.26                                 | 0.29 $\pm$ 0.08                                           | 3.18 $\pm$ 0.37                             | 0.15 $\pm$ 0.02                                       |
| IR62                 | 1                     | 1.33 $\pm$ 0.88           | R                     | 0.06 $\pm$ 0.01                    | 0.06 $\pm$ 0.00                   | 1.24 $\pm$ 0.22                    | 0.92 $\pm$ 0.27                   | 0.12 $\pm$ 0.01                                 | 3.04 $\pm$ 0.47                                 | 0.14 $\pm$ 0.03                                           | 0.49 $\pm$ 0.17                             | 0.02 $\pm$ 0.01                                       |
|                      | 2                     | 0.67 $\pm$ 0.33           | R                     | 0.11 $\pm$ 0.02                    | 0.05 $\pm$ 0.01                   | 1.47 $\pm$ 0.27                    | 1.65 $\pm$ 0.36                   | 0.16 $\pm$ 0.02                                 | 3.30 $\pm$ 0.58                                 | 0.20 $\pm$ 0.04                                           | 1.16 $\pm$ 0.50                             | 0.07 $\pm$ 0.03                                       |
|                      | 3                     | 0.33 $\pm$ 0.33           | R                     | 0.31 $\pm$ 0.00                    | 0.08 $\pm$ 0.02                   | 2.72 $\pm$ 1.09                    | 1.85 $\pm$ 0.59                   | 0.39 $\pm$ 0.02                                 | 5.55 $\pm$ 1.44                                 | 0.28 $\pm$ 0.10                                           | 0.49 $\pm$ 0.02                             | 0.01 $\pm$ 0.00                                       |
| IR65482-4            | 1                     | 4.33 $\pm$ 0.67           | S                     | 0.17 $\pm$ 0.04                    | 0.16 $\pm$ 0.03                   | 0.71 $\pm$ 0.01                    | 0.49 $\pm$ 0.05                   | 0.34 $\pm$ 0.02                                 | 1.24 $\pm$ 0.05                                 | 0.06 $\pm$ 0.00                                           | 0.94 $\pm$ 0.08                             | 0.04 $\pm$ 0.01                                       |
|                      | 2                     | 1.67 $\pm$ 0.67           | R                     | 0.32 $\pm$ 0.04                    | 0.23 $\pm$ 0.02                   | 2.13 $\pm$ 0.13                    | 1.14 $\pm$ 0.16                   | 0.55 $\pm$ 0.06                                 | 3.18 $\pm$ 0.21                                 | 0.18 $\pm$ 0.01                                           | 2.21 $\pm$ 0.20                             | 0.11 $\pm$ 0.01                                       |
|                      | 3                     | 3.00 $\pm$ 0.00           | MR                    | 0.58 $\pm$ 0.26                    | 0.28 $\pm$ 0.09                   | 3.53 $\pm$ 0.43                    | 1.81 $\pm$ 0.17                   | 0.86 $\pm$ 0.34                                 | 4.75 $\pm$ 0.37                                 | 0.30 $\pm$ 0.00                                           | 3.20 $\pm$ 0.51                             | 0.16 $\pm$ 0.03                                       |
| IR82391 H            | 1                     | 7.00 $\pm$ 0.00           | S                     | 0.18 $\pm$ 0.05                    | 0.12 $\pm$ 0.02                   | 1.28 $\pm$ 0.30                    | 1.03 $\pm$ 0.18                   | 0.30 $\pm$ 0.07                                 | 1.96 $\pm$ 0.47                                 | 0.13 $\pm$ 0.03                                           | 0.63 $\pm$ 0.03                             | 0.02 $\pm$ 0.01                                       |
|                      | 2                     | 5.67 $\pm$ 0.67           | S                     | 0.15 $\pm$ 0.03                    | 0.07 $\pm$ 0.02                   | 3.56 $\pm$ 0.57                    | 2.21 $\pm$ 0.77                   | 0.22 $\pm$ 0.05                                 | 7.55 $\pm$ 1.16                                 | 0.37 $\pm$ 0.07                                           | 0.87 $\pm$ 0.30                             | 0.04 $\pm$ 0.02                                       |
|                      | 3                     | 6.33 $\pm$ 0.33           | S                     | 0.35 $\pm$ 0.25                    | 0.20 $\pm$ 0.06                   | 3.46 $\pm$ 0.64                    | 1.79 $\pm$ 0.32                   | 0.55 $\pm$ 0.30                                 | 6.35 $\pm$ 0.86                                 | 0.31 $\pm$ 0.06                                           | 2.58 $\pm$ 0.15                             | 0.14 $\pm$ 0.02                                       |

|              |   |           |    |           |           |           |           |           |           |           |           |           |
|--------------|---|-----------|----|-----------|-----------|-----------|-----------|-----------|-----------|-----------|-----------|-----------|
| IR82396 H    | 1 | 7.00±0.00 | S  | 0.02±0.01 | 0.02±0.01 | 0.70±0.07 | 0.44±0.09 | 0.04±0.01 | 1.14±0.03 | 0.07±0.00 | 0.67±0.29 | 0.04±0.02 |
|              | 2 | 5.00±1.15 | S  | 0.18±0.02 | 0.07±0.01 | 1.31±0.21 | 0.77±0.10 | 0.25±0.01 | 1.61±0.24 | 0.12±0.02 | 1.49±0.18 | 0.08±0.01 |
|              | 3 | 3.00±0.00 | MR | 0.13±0.01 | 0.36±0.03 | 2.34±0.06 | 1.08±0.03 | 0.49±0.04 | 3.52±0.09 | 0.20±0.00 | 2.16±0.01 | 0.11±0.00 |
| Pokkali      | 1 | 6.00±1.00 | S  | 0.29±0.10 | 0.18±0.03 | 1.41±0.12 | 0.86±0.01 | 0.47±0.10 | 2.24±0.13 | 0.12±0.02 | 1.02±0.10 | 0.04±0.00 |
|              | 2 | 1.33±0.88 | R  | 0.92±0.30 | 0.50±0.14 | 3.12±0.95 | 1.65±0.58 | 1.42±0.43 | 3.54±1.53 | 0.22±0.08 | 2.77±0.82 | 0.09±0.04 |
|              | 3 | 1.33±0.88 | R  | 0.50±0.15 | 0.27±0.06 | 4.36±0.16 | 1.17±0.07 | 0.78±0.20 | 5.89±0.19 | 0.32±0.02 | 3.40±0.89 | 0.17±0.05 |
| Swarnalata   | 1 | 3.00±1.15 | MR | 0.38±0.10 | 0.24±0.06 | 1.79±0.24 | 1.26±0.17 | 0.62±0.15 | 2.31±0.41 | 0.16±0.02 | 1.49±0.47 | 0.06±0.03 |
|              | 2 | 3.67±0.67 | MR | 0.46±0.04 | 0.18±0.04 | 2.91±0.50 | 1.71±0.29 | 0.63±0.06 | 3.26±0.79 | 0.27±0.05 | 2.55±0.52 | 0.13±0.03 |
|              | 3 | 4.33±0.67 | S  | 0.38±0.10 | 0.39±0.25 | 3.86±0.27 | 1.75±0.21 | 0.77±0.35 | 5.77±0.48 | 0.32±0.04 | 2.88±0.24 | 0.14±0.04 |
| TKM6         | 1 | 5.67±1.33 | S  | 0.18±0.04 | 0.16±0.03 | 1.04±0.13 | 0.72±0.06 | 0.34±0.07 | 1.46±0.18 | 0.10±0.01 | 1.17±0.68 | 0.06±0.04 |
|              | 2 | 5.00±0.00 | S  | 0.37±0.15 | 0.15±0.05 | 2.03±0.07 | 1.28±0.20 | 0.52±0.20 | 3.61±0.16 | 0.19±0.02 | 1.55±0.02 | 0.07±0.01 |
|              | 3 | 5.00±1.15 | S  | 0.30±0.02 | 0.15±0.03 | 2.36±0.30 | 0.95±0.22 | 0.45±0.04 | 4.20±0.53 | 0.19±0.03 | 2.56±0.42 | 0.14±0.03 |
| TN1          | 1 | 5.00±0.00 | S  | 0.45±0.16 | 0.19±0.07 | 2.27±0.23 | 1.60±0.33 | 0.64±0.22 | 3.33±0.78 | 0.22±0.05 | 1.61±0.34 | 0.06±0.01 |
|              | 2 | 6.67±0.33 | S  | 0.46±0.09 | 0.30±0.06 | 2.56±0.12 | 1.50±0.00 | 0.76±0.08 | 4.10±0.12 | 0.22±0.01 | 2.11±0.51 | 0.09±0.04 |
|              | 3 | 6.67±0.33 | S  | 0.63±0.16 | 0.30±0.09 | 3.49±0.81 | 2.58±0.21 | 0.93±0.24 | 5.04±1.00 | 0.34±0.07 | 2.88±0.62 | 0.13±0.03 |
| Triveni      | 1 | 3.67±1.76 | MR | 0.51±0.05 | 0.35±0.01 | 1.81±0.28 | 1.47±0.27 | 0.86±0.04 | 3.81±0.35 | 0.16±0.02 | 1.30±0.29 | 0.03±0.02 |
|              | 2 | 3.67±0.67 | MR | 0.66±0.15 | 0.47±0.06 | 2.76±0.14 | 2.28±0.03 | 1.13±0.22 | 4.72±0.17 | 0.26±0.02 | 2.70±0.04 | 0.10±0.01 |
|              | 3 | 3.00±0.00 | MR | 0.34±0.07 | 0.32±0.08 | 4.23±0.50 | 2.37±0.39 | 0.66±0.13 | 4.92±0.88 | 0.40±0.06 | 2.53±0.11 | 0.12±0.01 |
| Utri Rajapan | 1 | 3.00±0.00 | MR | 0.52±0.08 | 0.23±0.01 | 2.76±0.22 | 1.52±0.18 | 0.75±0.08 | 4.36±0.04 | 0.24±0.01 | 1.41±0.10 | 0.04±0.01 |
|              | 2 | 3.00±0.00 | MR | 0.56±0.14 | 0.32±0.09 | 4.45±0.67 | 2.01±0.04 | 0.89±0.22 | 7.54±0.63 | 0.37±0.04 | 3.65±0.13 | 0.18±0.02 |
|              | 3 | 3.00±0.00 | MR | 0.92±0.18 | 0.44±0.11 | 4.84±0.32 | 3.17±0.49 | 1.36±0.27 | 8.56±0.76 | 0.44±0.03 | 4.31±0.42 | 0.20±0.01 |

1: Varieties are presented in alphabetical order

2: 1 = 0 added nitrogen, 2 = 60 Kg N ha<sup>-1</sup>, 3 = 150 Kg N ha<sup>-1</sup>

3: Reactions are based on standard evaluation system (SES) damage ratings to seedlings in the bioassay. Because plants were harvested before any plants had died, we assigned reactions as follows: < 3 = resistant (R), 3-4 = moderately resistant (MR), and > 4 = susceptible.
